# Supplementary material for: Erratum to: DNA methylation age of human tissues and cell types
Source: PubMed Central journal article supplement (PMC4427927; doi:10.1186/s13059-015-0649-6), 2015-05-13

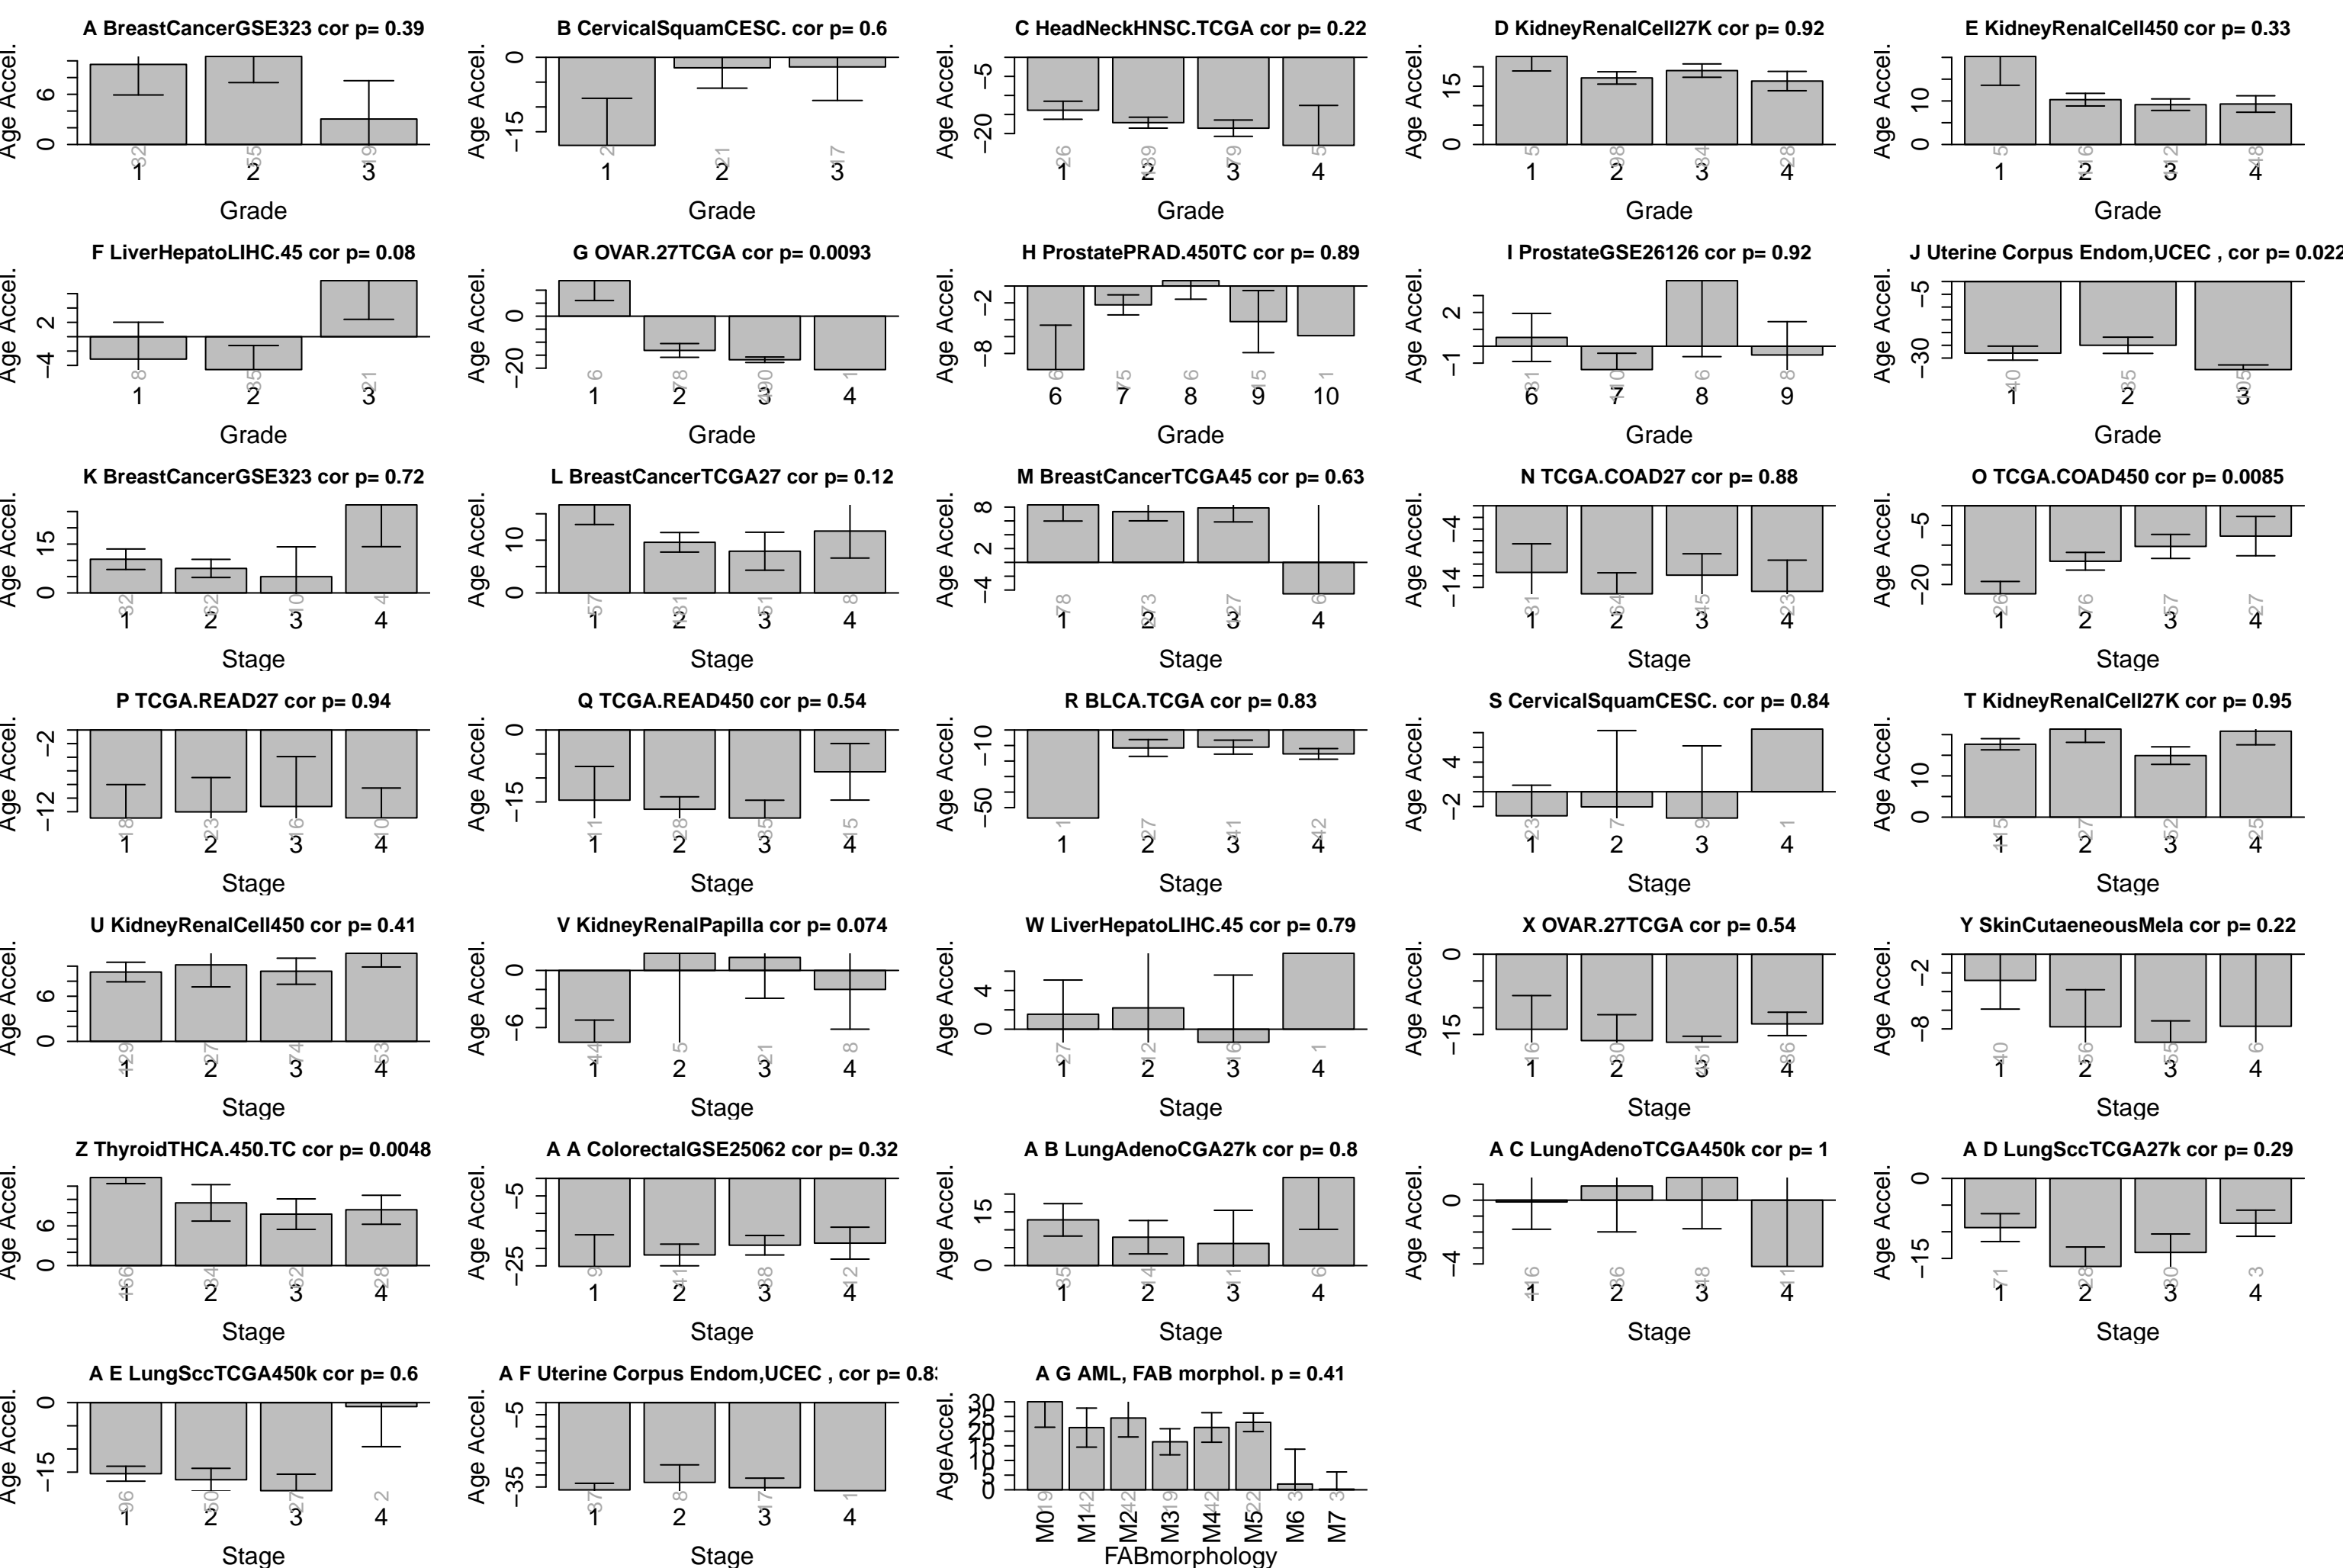

Supplement: 13059_2015_649_MOESM3_ESM.pdf [file 13059_2015_649_MOESM3_ESM.pdf]
